# Supplementary material for: Widespread balancing selection and pathogen-driven selection at blood group antigen genes
Source: HighWire-hosted journal article supplement (doi:10.1101/gr.082768.108), 2008-11-07
Supplement: supplementary_file2.pdf [file supplementary_file2.pdf]

**Supplementary Figure 1**

Correlation between pathogen richness and allele frequency for all significantly associated BGA SNPs. Populations from different broad geographic areas are coded by different colors: Sub-Saharan Africa (green), America (black), Asia (red), Europe (blue), Middle East (orange), Oceania (gray).

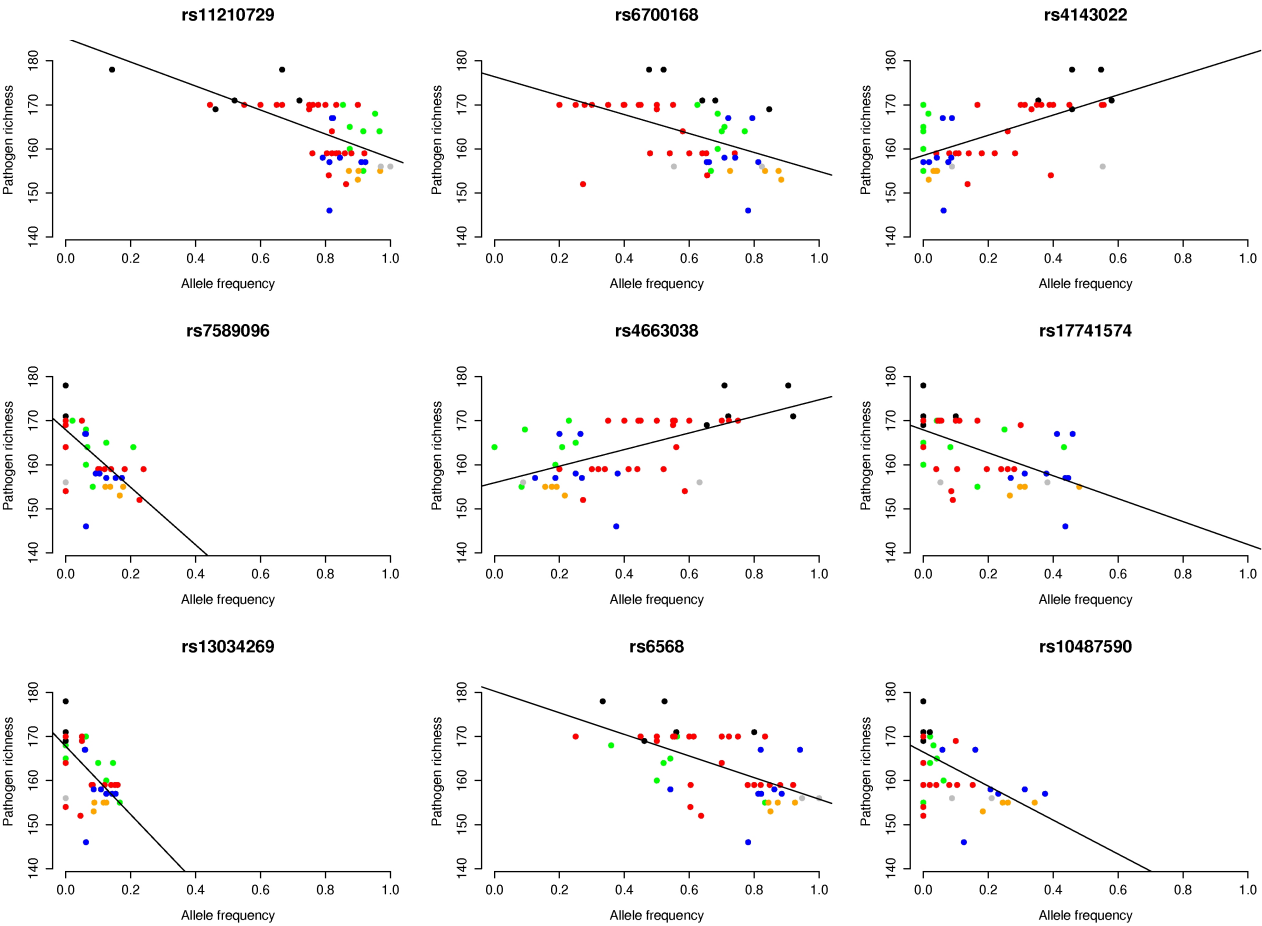

**rs2228332**

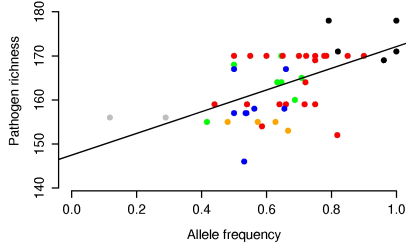

**rs2073824**

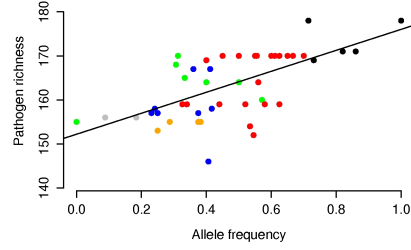

**rs2421826**

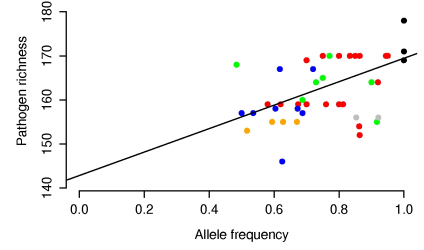

**rs1547059**

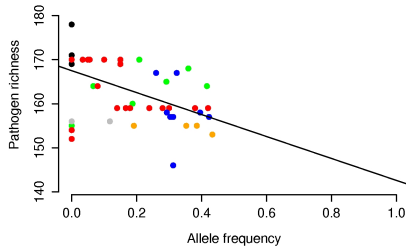

**rs2072081**

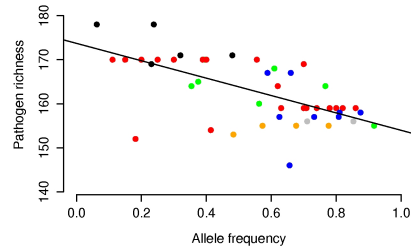

**rs2074108**

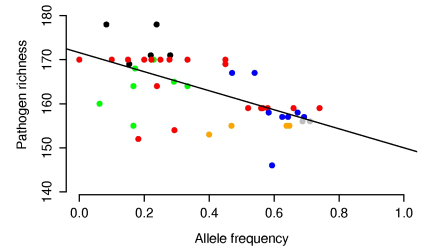

**rs692899**

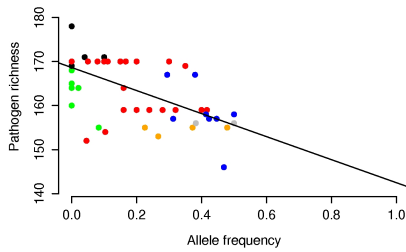

**rs10853535**

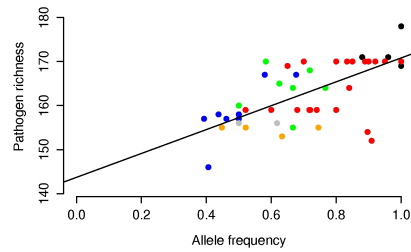

**rs566309**

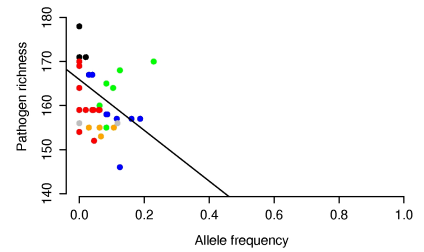

**rs6507641**

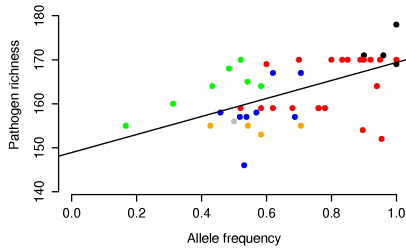

**rs602662**

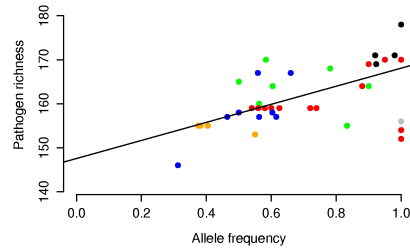

**rs485186**

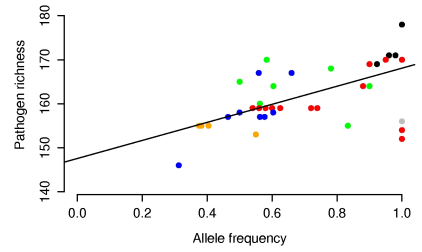

**rs504963**

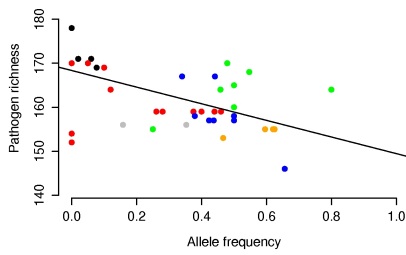

**rs9466910**

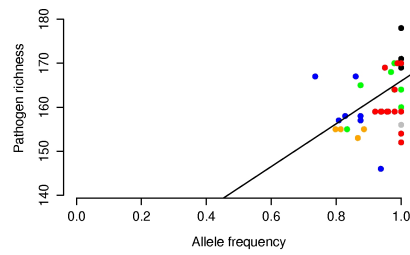

**rs9466912**

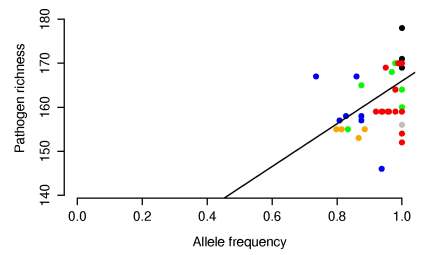

**rs17576994**

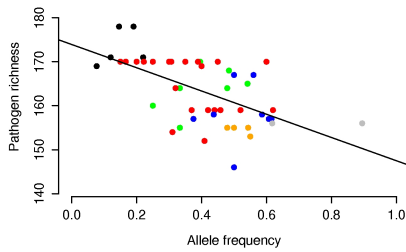

## Supplementary Figure 2

Correlation between observed/expected heterozygosity and pathogen richness for two SNPs in *SLC14A1* (see text). Populations from different broad geographic areas are coded by different colors: Sub-Saharan Africa (green), America (black), Asia (red), Europe (blue), Middle East (orange), Oceania (gray).

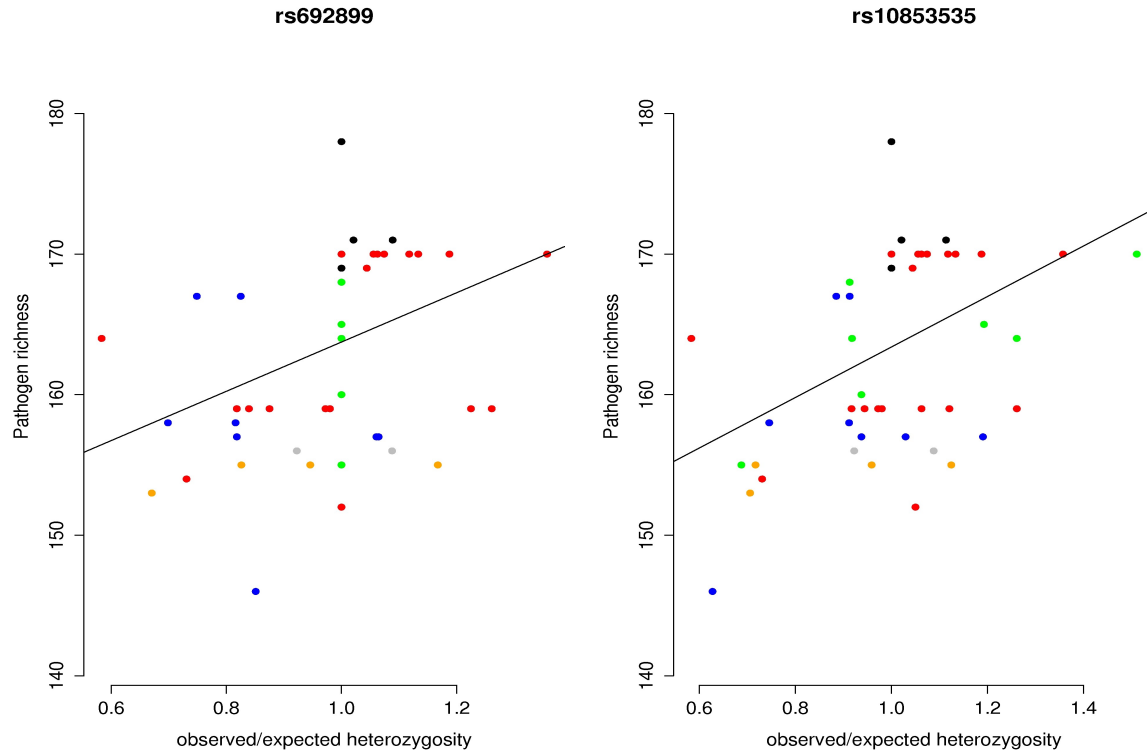

### Supplementary Figure 3

Sliding window analysis of  $F_{ST}$ . Red shading identifies the regions we analyzed. Gray shading indicates resequencing gaps. We used windows of 5 kb sliding with a step of 150 bp. Hatched lines represent the 2.5<sup>th</sup> and 97.5<sup>th</sup> percentiles in the distribution of  $F_{ST}$  values calculated for SeattleSNPs genes. Negative  $F_{ST}$  values should be interpreted as equal to 0.

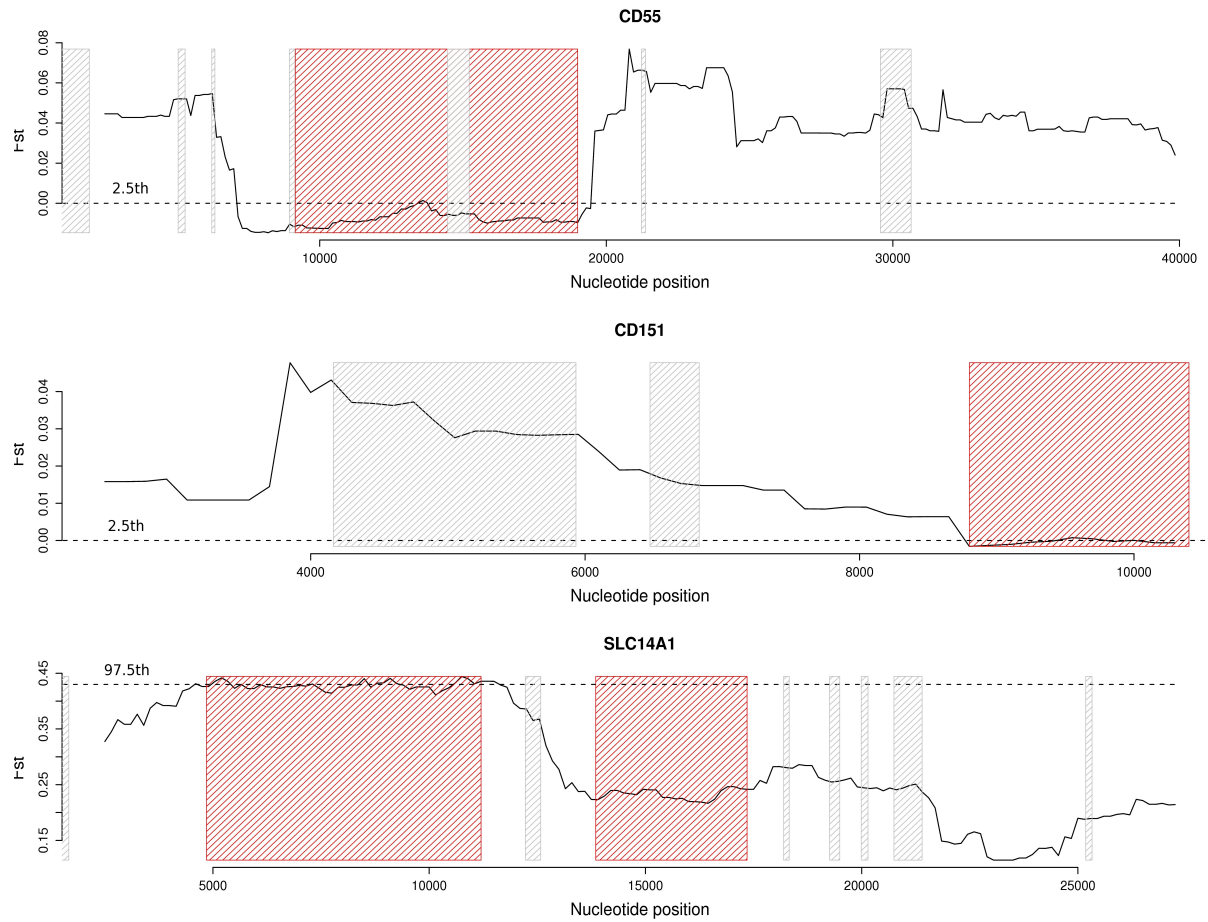

Supplementary Figure 4

Estimated tree for the *CD55* gene region we analyzed. Mutations are represented as black dots and named for their physical position along the region. The absolute frequency of each haplotype is also reported.

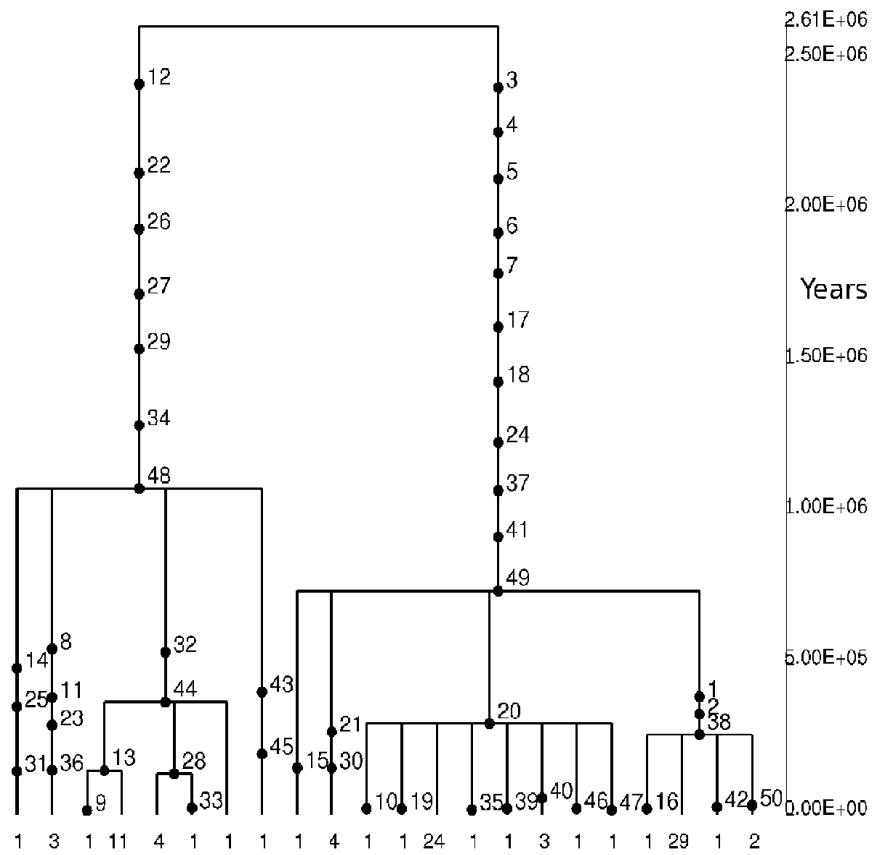

**Supplementary Figure 5**

(A) Linkage disequilibrium (LD) blocks for the *CD151* gene region we analyzed.  
(B) Estimated tree for the *CD151* gene region corresponding to the large LD block. Mutations are represented as black dots and named for their physical position along the region. The absolute frequency of each haplotype is also reported.

A.

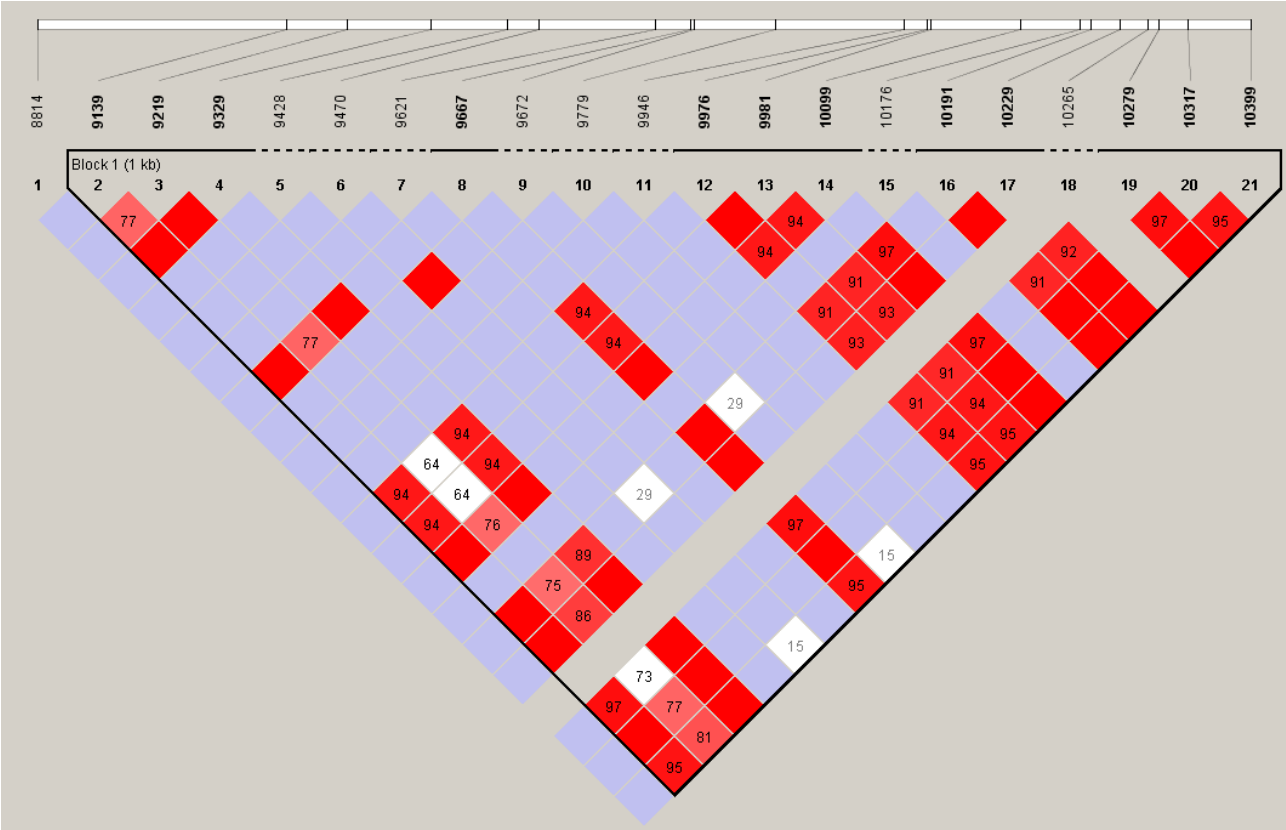

B.

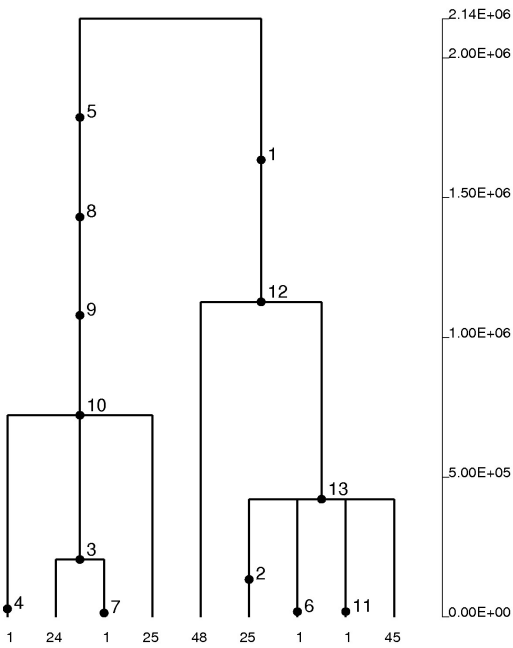

**Supplementary Figure 6**  
 LD blocks (A) and estimated tree (B) for the *FUT2* promoter region.

A.

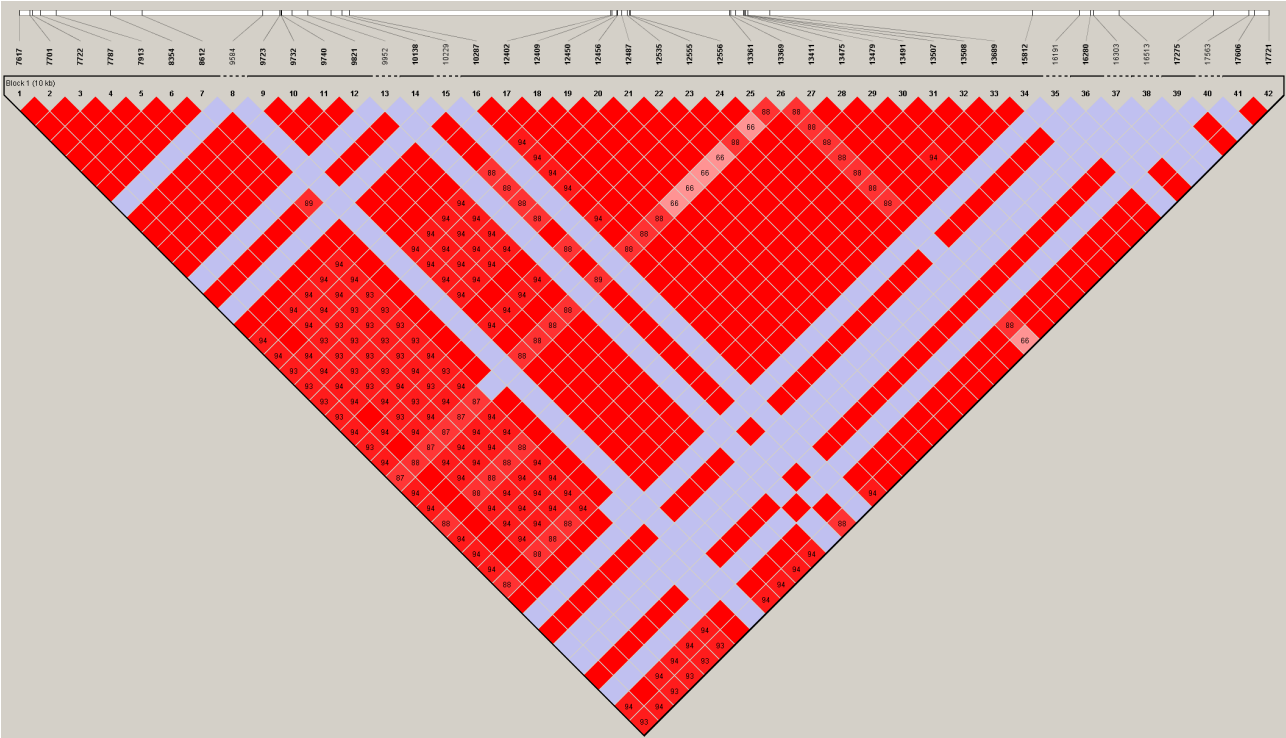

B.

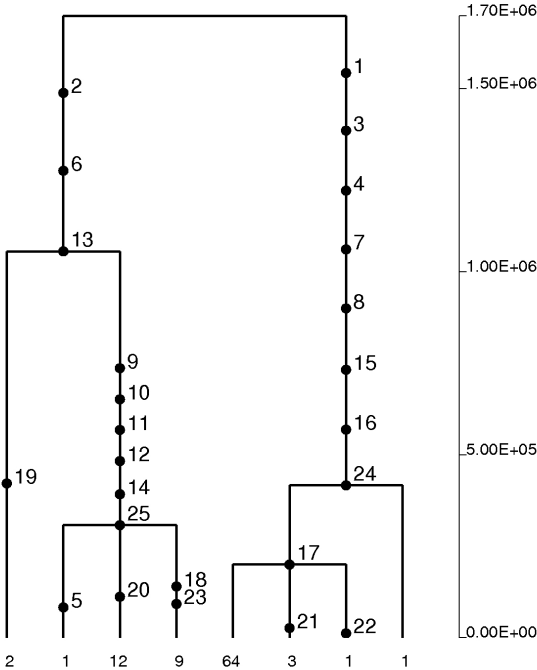



**Supplementary Figure 7**

(A) Linkage disequilibrium blocks for the *SLC14A1* gene region we analyzed. Arrows indicate the following SNPs (from left to right): rs692899 (correlates with pathogens), rs10853535 (correlates with pathogens) and rs1058396 (Ans280Asp).  
(B) Estimated tree for the *SLC14A1* gene region corresponding to the larger LD block.

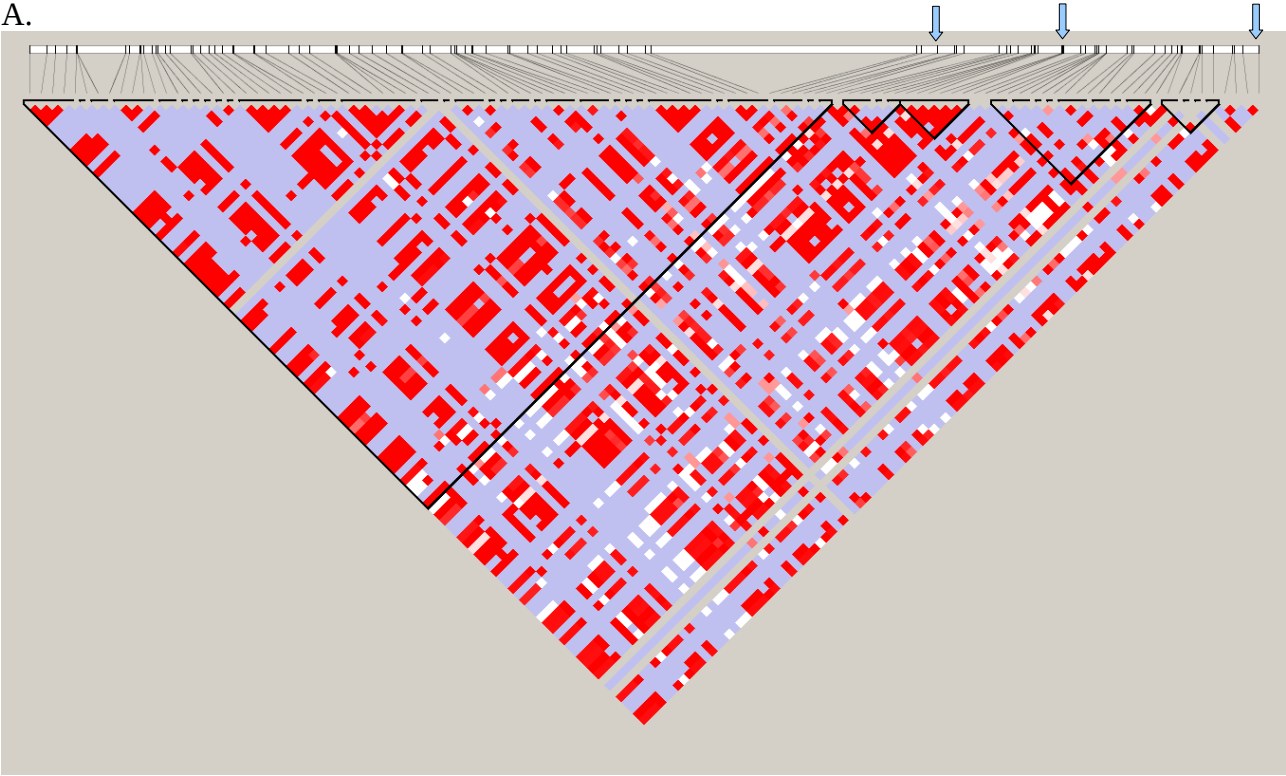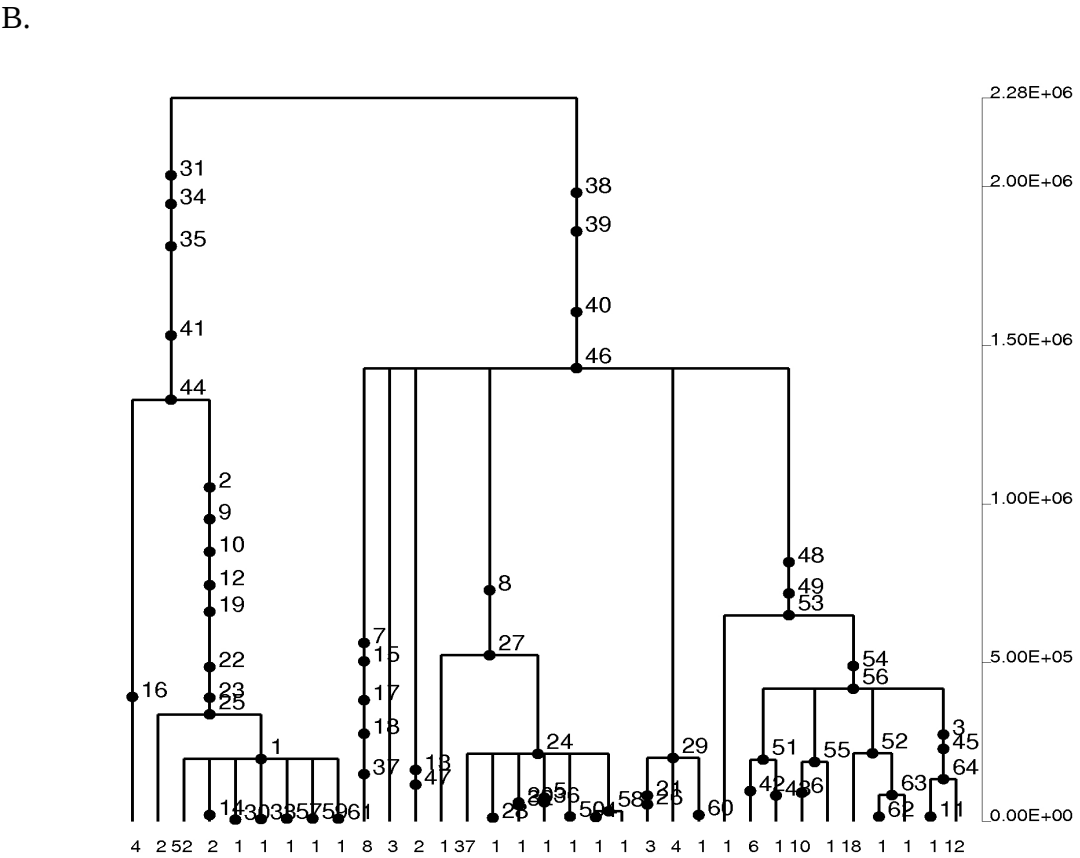

**Supplementary Figure 8**

- (A) LD blocks for the *BSG* gene.  
(B) Estimated tree for the *BSG* gene region corresponding to the second LD block.

A.

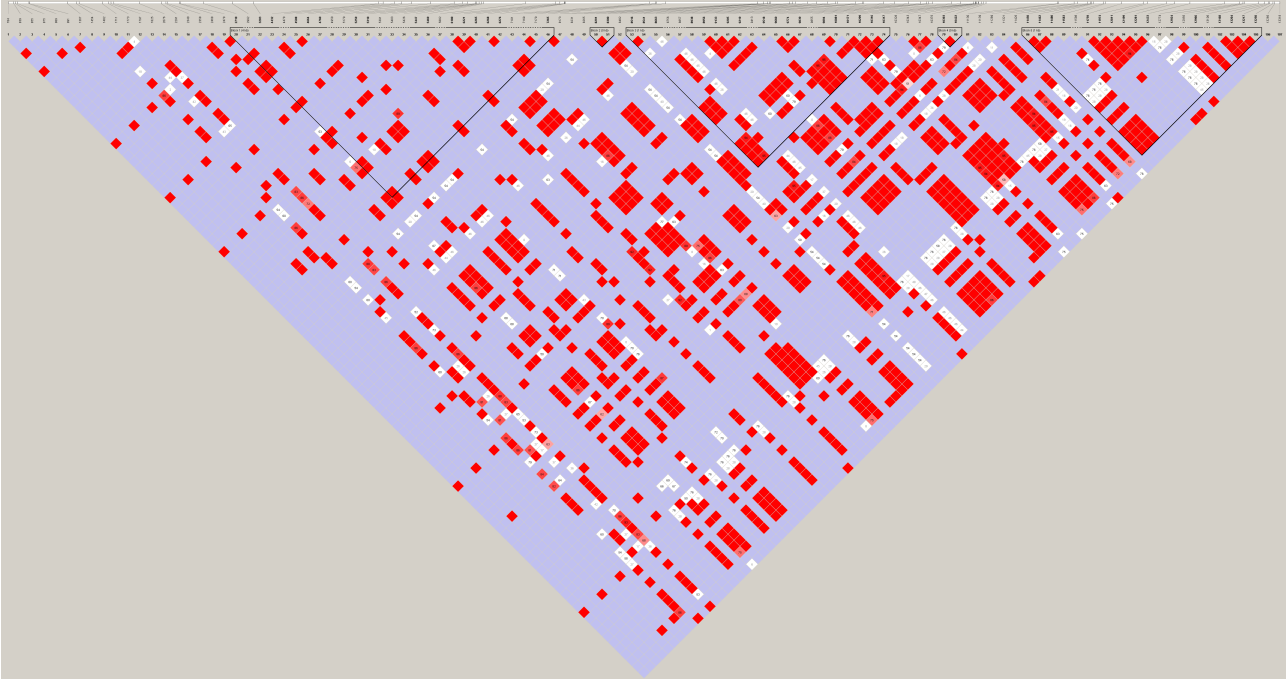

B.

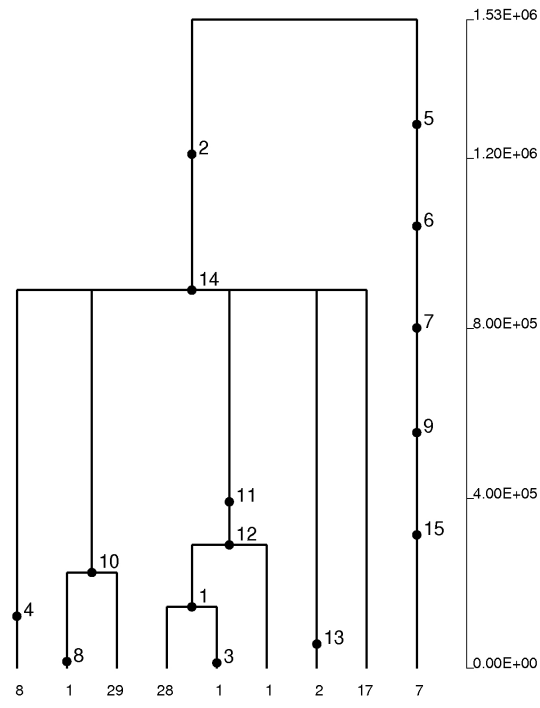

**Supplementary table 1.**

$\theta_w$  and  $\pi$  values corresponding to the 2.5<sup>th</sup> and 97.5<sup>th</sup> percentile in the distribution of 5 kb windows deriving from NIEHS genes.

|            | $\theta$ (x10 <sup>-4</sup> ) |                    | $\pi$ (x 10 <sup>-4</sup> ) |                    |
|------------|-------------------------------|--------------------|-----------------------------|--------------------|
|            | 2.5 <sup>th</sup>             | 97.5 <sup>th</sup> | 2.5 <sup>th</sup>           | 97.5 <sup>th</sup> |
|            |                               |                    |                             |                    |
| <b>YRI</b> | 2.14                          | 18.61              | 1.17                        | 19.89              |
| <b>AA</b>  | 3.53                          | 18.17              | 2.04                        | 19.06              |
| <b>EA</b>  | 1.38                          | 14.25              | 0.65                        | 18.36              |
| <b>AS</b>  | 1.35                          | 13.63              | 0.35                        | 17.21              |

**Supplementary Table 2.**

Percentile ranks for selected BGA gene regions.

| Gene            | Pop. | Tajima's D | Fu & Li's D* | Fu & Li's F* |
|-----------------|------|------------|--------------|--------------|
|                 |      | rank       | rank         | rank         |
| <i>CD55</i>     | AA   | .88        | .42          | .58          |
|                 | EA   | .80        | .71          | .78          |
| <i>CD151</i>    | YRI  | .97        | .81          | .92          |
|                 | AA   | >.99       | .86          | .98          |
|                 | EA   | .85        | .66          | .77          |
| <i>FUT2 pm</i>  | YRI  | >.99       | .95          | >.99         |
|                 | EA   | .10        | .20          | .16          |
| <i>FUT2 cds</i> | YRI  | .98        | .46          | .71          |
|                 | EA   | .95        | .69          | .87          |
| <i>SLC14A1</i>  | YRI  | .61        | .81          | .75          |
|                 | AA   | .91        | .99          | .98          |
|                 | EA   | .94        | .78          | .91          |
| <i>BSG</i>      | YRI  | .81        | .83          | .81          |
|                 | EA   | .13        | .059         | .059         |

Note: percentile ranks were calculated in 5 kb windows deriving from SeattleSNPs genes resequenced across panel 1 or panel 2 (see methods in main text for details).

**Supplementary table 3.**

Percentile rank of Tajima's D statistics for MLHKA control genes.

| Gene    | Tajima's D<br><i>rank</i> | Gene  | Tajima's D<br><i>rank</i> |
|---------|---------------------------|-------|---------------------------|
| VNN3    |                           | TUBA1 |                           |
| YRI     | 0.1722689                 | YRI   | 0.7857143                 |
| AA      | 0.7647059                 | AA    | 0.7352941                 |
| EA      | 0.5210084                 | EA    | 0.5672269                 |
| AS      | 0.8277311                 | AS    | 0.3235294                 |
| PLA2G2D |                           | MT3   |                           |
| YRI     | 0.7605042                 | YRI   | 0.684874                  |
| AA      | 0.6302521                 | AA    | 0.407563                  |
| EA      | 0.2899160                 | EA    | 0.4453782                 |
| AS      | 0.4327731                 | AS    | 0.8445378                 |
| MB      |                           | NUDT1 |                           |
| YRI     | 0.2605042                 | YRI   | 0.6386555                 |
| AA      | 0.512605                  | AA    | 0.6890756                 |
| EA      | 0.8865546                 | EA    | 0.512605                  |
| AS      | 0.07142857                | AS    | 0.7268908                 |
| MAD2L2  |                           | PRDX5 |                           |
| YRI     | 0.2478992                 | YRI   | 0.7268908                 |
| AA      | 0.3823529                 | AA    | 0.302521                  |
| EA      | 0.8277311                 | EA    | 0.6554622                 |
| AS      | 0.789916                  | AS    | 0.3445378                 |
| HRAS    |                           | RETN  |                           |
| YRI     | 0.4243697                 | YRI   | 0.7983193                 |
| AA      | 0.8529412                 | AA    | 0.7815126                 |
| EA      | 0.3865546                 | EA    | 0.8991597                 |
| AS      | 0.7857143                 | AS    | 0.8067227                 |
| CYP17A1 |                           | JUND  |                           |
| YRI     | 0.09243697                | YRI   | 0.9033613                 |
| AA      | 0.4705882                 | AA    | 0.802521                  |
| EA      | 0.9705882                 | EA    | 0.9117647                 |
| AS      | 0.8991597                 | AS    | 0.920168                  |
| ATOX1   |                           |       |                           |
| YRI     | 0.197479                  |       |                           |
| AA      | 0.4411765                 |       |                           |
| EA      | 0.3697479                 |       |                           |
| AS      | 0.05882353                |       |                           |
| BNIP3   |                           |       |                           |
| YRI     | 0.1008403                 |       |                           |
| AA      | 0.2647059                 |       |                           |
| EA      | 0.4117647                 |       |                           |
| AS      | 0.802521                  |       |                           |
| CDC20   |                           |       |                           |
| YRI     | 0.5420168                 |       |                           |
| AA      | 0.4327731                 |       |                           |
| EA      | 0.2815126                 |       |                           |
| AS      | 0.1008403                 |       |                           |
| NGB     |                           |       |                           |
| YRI     | 0.3361345                 |       |                           |
| AA      | 0.1596639                 |       |                           |
| EA      | 0.3109244                 |       |                           |
| AS      | 0.4831933                 |       |                           |
